# Supplementary material
Source: Springer Nature journal article supplement (https://www.springermedizin.de/resource/supplementary/12889_2007_799_MOESM1_ESM.pdf/9501794)
Supplement: MOESM1 [file 9501794]

1- *Today, if you wanted to consult a health professional for psychological difficulties or behavioral problems, who would you go to first?*

2- *Today, if you wanted to consult a health professional for psychological difficulties or behavioral problems, who would you like to ensure follow-up care?*

3- *Today, if you wanted to go into psychotherapy, who would you see?*

In the second question, follow-up refers to regular meetings over a long period, with no notion of psychotherapy. For each question, subjects could answer freely and if they had no idea, a list of health care providers (including family and friends) was given to them.

The other six questions were simple questions answered by “yes”, “no” or “I don’t know”:

4- *If your GP suggested you see a mental health professional (psychologist, psychiatrist or other psychotherapist) for advice or follow-up, would you take his advice?*

5- *If you had psychological symptoms or difficulties, and if your GP suggested you take a pharmaceutical treatment (such as antidepressants, tranquilizers, anti-psychotic drugs), would you take it?*

6- *If you were to go for follow-up for psychological symptoms or difficulties, would you consult the person your GP refers you to?*

7- *Does your GP work together with mental health professionals (psychologists, psychiatrists or other psychotherapists)?*

8- *Can your GP manage his patients' psychological symptoms or difficulties alone?*

9- *In your opinion, is psychotherapy necessary in case of psychological difficulties or behavioral problems?*
